# Supplementary material for: Plasmons of hollow nanobar oligomers
Source: Royal Society of Chemistry journal article supplement (doi:10.1039/c9nj02575h), 2019-01-01
Supplement: c9nj02575h1.pdf [file c9nj02575h1.pdf]

## **Supplementary Information**

### **Plasmons of Hollow Nanobar Oligomers**

Junais Habeeb Mokkaath\*

[j.mokath@kcst.edu.kw](mailto:j.mokath@kcst.edu.kw)

Quantum Nanophotonics Simulations Lab, Department of Physics, Kuwait College of Science And  
Technology, Doha Area, 7th Ring Road, P.O. Box 27235, Kuwait.

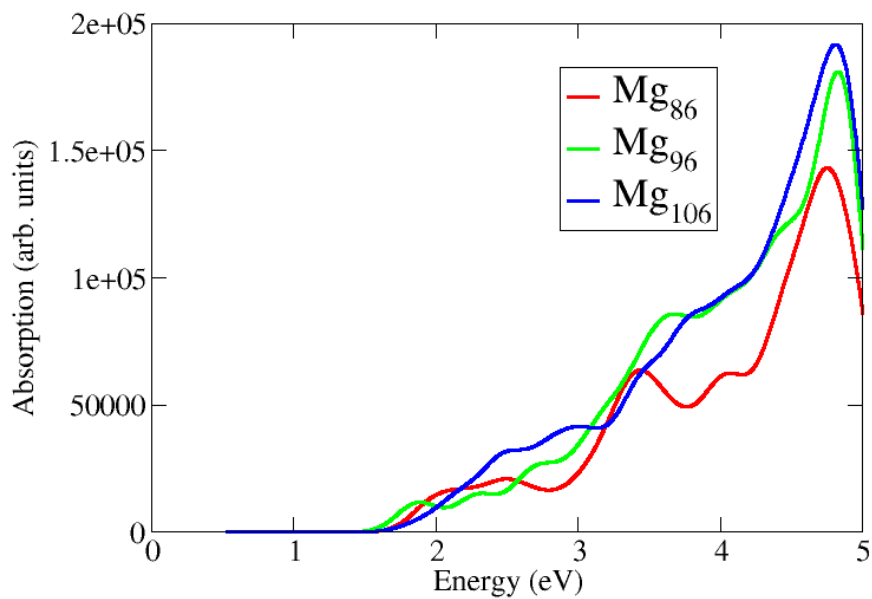

Figure S1: TD-DFT calculated optical absorption spectra of a single Mg nanobar as a function of the number of atoms.

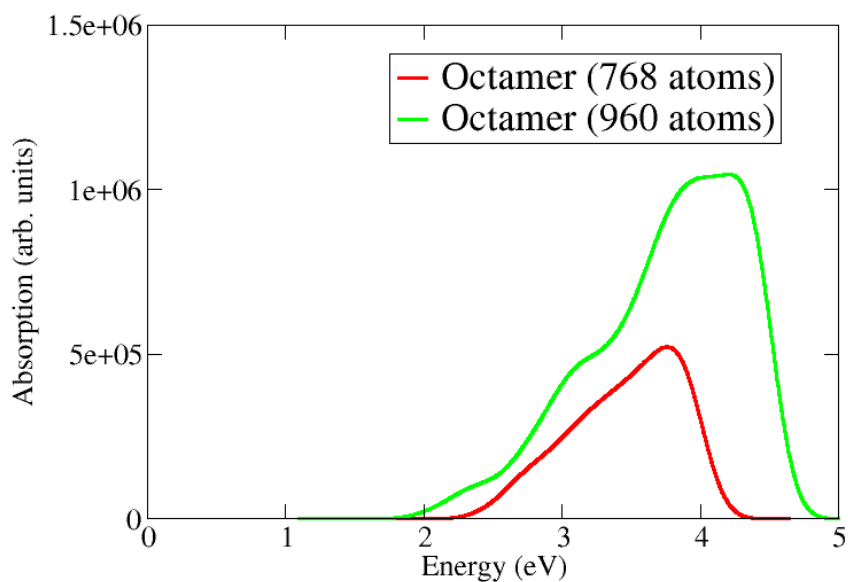

Figure S2: TD-DFT calculated optical absorption spectra of octamer oligomers having a different number of atoms.
